# Supplementary material
Source: Springer Nature journal article supplement (https://www.springermedizin.de/resource/supplementary/12894_2014_333_MOESM1_ESM.pdf/9513530)

Number of specimens

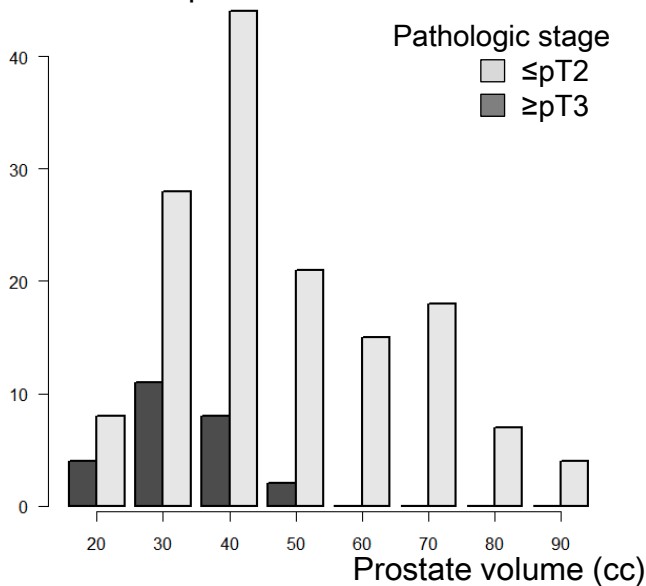

Number of specimens

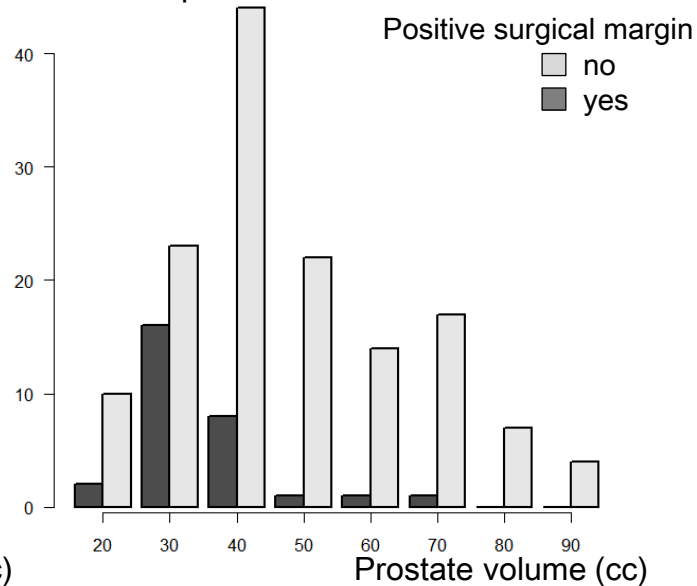

Number of specimens

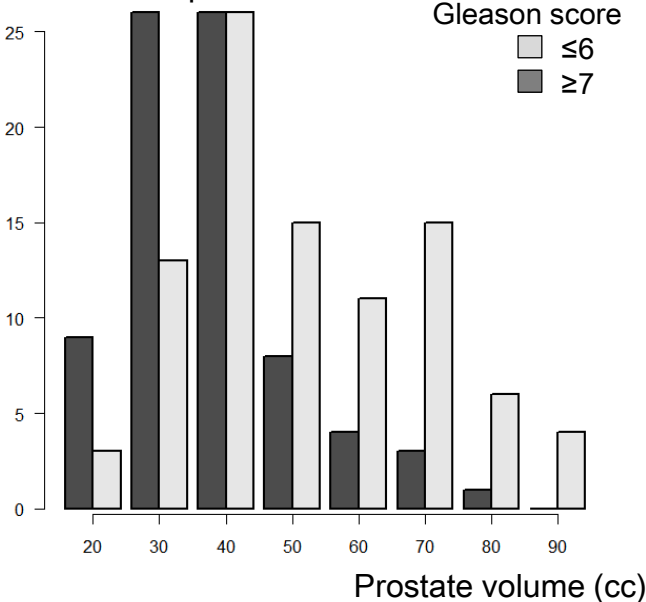

Number of specimens

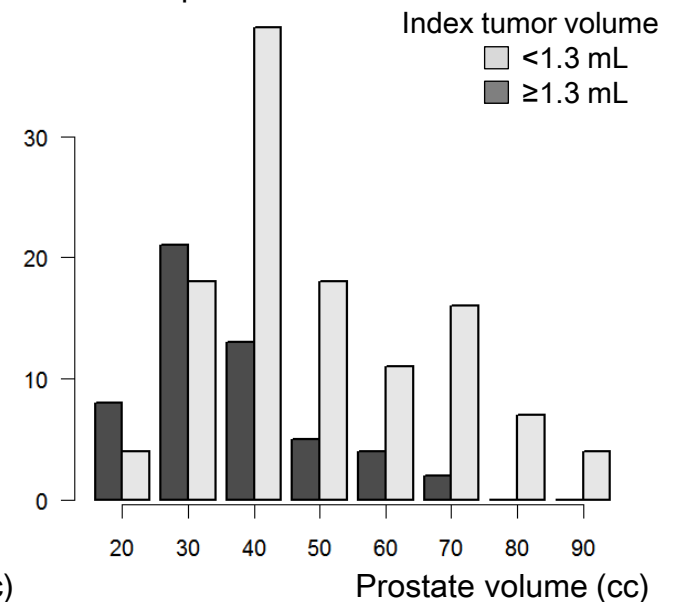

Supplement: MOESM1 [file 9513530]
